# Supplementary material for: β1 integrin deletion enhances progression of prostate cancer in the TRAMP mouse model
Source: PubMed Central journal article supplement — Sci Rep. 2012 Jul 24;2:526. doi: 10.1038/srep00526 (PMC3402831; doi:10.1038/srep00526), 2012-07-24
Supplement: srep00526-s1.pdf [file srep00526-s1.pdf]

Scientific Reports

## Supplementary Data

### **$\beta$ 1 integrin deletion enhances progression of prostate cancer in the TRAMP mouse model**

Kim Moran-Jones<sup>1</sup>, Anita Ledger<sup>1</sup>, and Matthew J. Naylor<sup>1,2,\*</sup>.

<sup>1</sup>Cancer Research Program, Garvan Institute of Medical Research, 384 Victoria St, Darlinghurst, NSW 2010, Australia.

<sup>2</sup>Discipline of Physiology & Bosch Institute, School of Medical Sciences, University of Sydney, NSW 2006, Australia.

Supplementary Figure 1

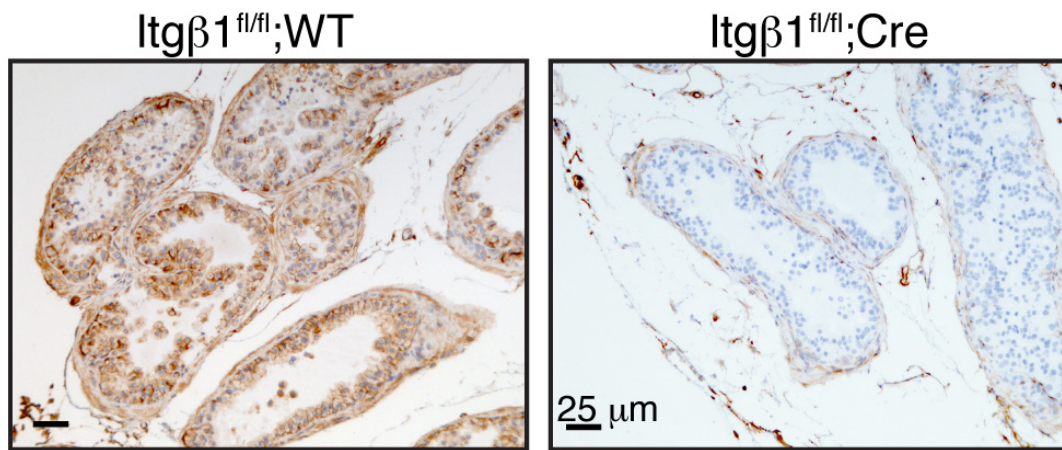

Immunostaining of  $\beta 1$  integrin in castrated/testosterone supplemented dorsal prostates was performed as described in main article. Loss of  $\beta 1$  integrin is almost 100 percent in  $Itg\beta 1^{fl/fl};Cre$  tissue, and appears to have no effect on the gross morphology of the gland. Scale bar,  $25\ \mu m$ .

## Supplementary Figure 2

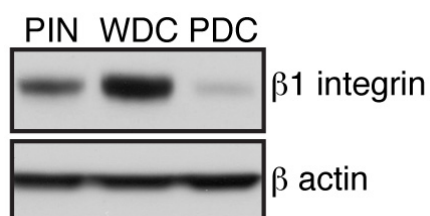

Immunoblots of proteins extracted from prostate glands displaying prostatic intra-epithelial neoplasia (PIN), well-differentiated carcinoma (WDC), and poorly-differentiated carcinoma (PDC), blotted for expression of  $\beta 1$  integrin. Loading control is  $\beta$ -actin.

Protein was extracted from flash-frozen prostate lobes using 1x NET buffer (50 mM Tris-HCl, 150 mM NaCl, 1% NP-40, and 2 mM EDTA, pH 7.6). Proteins were separated by SDS-PAGE, and transferred to PVDF membrane. These were subsequently blocked in 5% skim milk powder/TBST, before being incubated with antibodies against either  $\beta 1$  integrin (BD Bioscience, 610467, 1/2500) or  $\beta$ -actin (Sigma-Aldrich, AC-15, 1/40000). Specific binding was detected using HRP-conjugated secondary antibodies, and chemiluminescent reagent.
